# Supplementary material for: Co-occurring alterations in the RAS-MAPK pathway limit response to MET inhibitor treatment in MET exon 14 skipping mutation positive lung cancer
Source: bioRxiv or medRxiv preprint supplement (doi:10.1101/374181), 2019-05-24
Supplement: Supplementary file [file 374181-1.pdf]

**Supplemental Figures and Tables:**

**Supplemental Table S1**

|                                        | <b><i>MET</i>ex14 Cohort</b> | <b><i>EGFR</i>m Cohort</b> |
|----------------------------------------|------------------------------|----------------------------|
| Total # Samples                        | 332                          | 1653                       |
| Total # Patients                       | 289                          | 1489                       |
| Date Range                             | 10/2015-3/2018               | 4/2016-5/2017              |
| Gender (% Patients)                    |                              |                            |
| Female                                 | 172 (59.5%)                  | 992 (66.6%)                |
| Male                                   | 116 (40.1%)                  | 497 (33.4%)                |
| Not Specified                          | 1 (0.3%)                     | 0 (0%)                     |
| Mean Age                               | 73 years                     | 64.4 years                 |
| Stage III/IV (% Samples)               | 289 (100%)                   | 1653 (100%)                |
| Histology (% Patients)                 |                              |                            |
| Lung Adenocarcinoma                    | 163 (56.4%)                  | 532 (35.7%)                |
| NSCLC, not otherwise specified         | 93 (32.2%)                   | 954 (64.1%)                |
| Lung Squamous Cell Carcinoma           | 20 (6.9%)                    | 0 (0%)                     |
| Other                                  | 13 (4.5%) <sup>a</sup>       | 3 (0.2%) <sup>b</sup>      |
| Treatment History (% Samples)          |                              |                            |
| Unknown                                | 261 (78.6%)                  | 1653 (100%)                |
| Tyrosine Kinase Inhibitor <sup>c</sup> | 26 (7.8%)                    |                            |
| Chemotherapy <sup>d</sup>              | 22 (6.6%)                    |                            |
| Checkpoint Inhibitor                   | 17 (5.1%)                    |                            |
| Radiation                              | 3 (0.9%)                     |                            |

<sup>a</sup>Lung cancer NOS (2%), Carcinoid (0.7%), Sarcomatoid (0.7%), Large Cell (0.3%), Carcinosarcoma (0.3%), Small Cell Lung Cancer (0.3%)

<sup>b</sup>Lung cancer, not otherwise specified

<sup>c</sup>Crizotinib (3.3%), Erlotinib (2.7%), Alectinib (0.6%), MET TKI not otherwise specified (0.3%), Crizotinib/trametinib (0.3%), Cabozantinib (0.3%), Afatinib (0.3%)

<sup>d</sup>Including chemotherapy combinations: Pemetrexed/Pembrolizumab (0.3%), docetaxel/nintedanib (0.3%)

**Cell-free DNA cohort demographics.** Clinical and demographic data for two cohorts of patients with advanced NSCLC, incorporating all patients with either the *MET* exon 14 skipping mutation (*MET*ex14) or an activating epidermal growth factor mutation (*EGFR*m) identified by cfDNA sequencing over the specified time period.

Supplemental Table S2

| Patient #      | Histology            | Sample Prior to Known MET TKI Exposure |                                                                                                                                                                   | Sample After MET TKI Exposure |                                                                                                                                                |
|----------------|----------------------|----------------------------------------|-------------------------------------------------------------------------------------------------------------------------------------------------------------------|-------------------------------|------------------------------------------------------------------------------------------------------------------------------------------------|
|                |                      | Treatment Status                       | Genomic Alterations                                                                                                                                               | MET TKI Received              | Genomic Alterations % cfDNA/CNG                                                                                                                |
| 1              | Lung Adeno-carcinoma | Pre-treatment                          | METex14 (c.3028+3A>G, 7.6%), PTEN E43Q (0.1%), CCNE1 CNG (2.3)                                                                                                    | Crizotinib                    | METex14 (0.9-5.1%), BRAF R199G (0.1-0.2%), CCNE1 CNG (2.2), PIK3CA R38H (0.1%), MET Y1230S (0.3-1.5%), MET F1200I (0.2%), KRAS CNG (2.25-2.28) |
| 2 <sup>a</sup> | Lung Adeno-carcinoma | Pre-treatment                          | METex14 (c.2888-19_2895del27, 8%) <sup>b</sup>                                                                                                                    | Crizotinib                    | METex14 (2.2%), KRAS G12D (7.8%)                                                                                                               |
| 3              | Lung Adeno-carcinoma | Carboplatin/pemetrexed/bevacizumab     | METex14 (c.3028G>C, 1.2%), BRCA1 R691G (0.1%)                                                                                                                     | Crizotinib                    | METex14 (1%), FBXW7 R689Q (0.1%), AR W742C (0.1%), TP53 Y163S (0.1%), KIT CNG (2.2)                                                            |
| 4              | Lung Adeno-carcinoma | Pre-treatment                          | METex14 (c.3028G>C, 19.8%), NF1 I1499V (0.3%), BRAF CNG (2.6), NF1 R1534Q (0.1%), EGFR V851A (0.1%), EGFR CNG (2.5), MET CNG (2.6), CDK6 CNG (2.6), MYC CNG (2.4) | Crizotinib <sup>c</sup>       | METex14 (2.5%), NF1 I1499V (0.2%), CCND1 CNG (2.5), TP53 N239S (1.8%), TP53 R248W (0.5%), NF1 p.Gln2636fs (1.1%), MET p.Ser244fs (1.2%)        |
| 5              | Lung Adeno-carcinoma | Pre-treatment                          | METex14 (c.3028+1delG), MET CNG, CDK6 CNG, ATM splice site, MDM2 CNG, CDKN2A/B loss <sup>b</sup>                                                                  | Crizotinib                    | METex14 (53.4%), MET CNG (3.9), CDK6 CNG (3), AR CNG (2.3), PIK3CA CNG (2.3), MET Y1230H (9.1%), MET D1228N (4.3%), EGFR CNG (2.2)             |
|                |                      |                                        |                                                                                                                                                                   | Glesatinib                    | METex14 (63.5%), MET CNG (4.9), CDK6 CNG (3.3), PIK3CA CNG (2.4), MET L1195V (0.8%), MET D1228N (13.9%)                                        |
| 6              | Lung SCC             | Nivolumab                              | METex14 (c.2888-12_2889delCTCTGTT TTAAGATinsTAAGAG , 4.6%)                                                                                                        | Crizotinib                    | METex14 (7.7%), EGFR CNG (2.7), TP53 p.Arg156del (0.04%)                                                                                       |
| 7              | Lung Adeno-carcinoma | Carboplatin/Paclitaxel                 | TP53 P27L (0.2%), TP53 c375+1G>C (0.1%)                                                                                                                           | Crizotinib                    | METex14 (c.2888-20_2888delTTCTTTCTCTCTGTTTAAAGA, 0.02%)                                                                                        |

|    |                      |                                    |                                                                                                                                                                              |            |                                                                                                                        |
|----|----------------------|------------------------------------|------------------------------------------------------------------------------------------------------------------------------------------------------------------------------|------------|------------------------------------------------------------------------------------------------------------------------|
| 8  | Lung Adeno-carcinoma | Carboplatin/pemetrexed/bevacizumab | METex14 (c.3028+2T>C, 0.4%), BRAF S273G (0.5%), MET R1170* (47.7%)                                                                                                           | Crizotinib | BRAF S273G (0.3%), TP53 V173M (0.3%)                                                                                   |
| 9  | Lung Adeno-carcinoma | Unknown                            | METex14 (c.3028G>T, 14.5%), MET CNG (2.4), EGFR K80T (0.8%), ERBB2 N68S (0.7%), KRAS G12S (0.1%)                                                                             | Crizotinib | METex14 (50%), MET CNG (4), EGFR K80T (0.3%), ERBB2 N68S (3.5%), MET L1195V (16.6%), TP53 V216E (0.1%), EGFR CNG (2.4) |
| 10 | Lung Adeno-carcinoma | Unknown                            | METex14 (c.3028+1G>T, 0.5%), BRCA1 I3044V (0.2%), FGFR1 T340M (0.1%)                                                                                                         | Crizotinib | BRCA2 I3044V (0.1%), FGFR1 T340M (0.2%)                                                                                |
| 11 | Lung Adeno-carcinoma | Unknown                            | METex14 (c.3012_3028+3delAGCTACTTTTCCAGAAGGT AinsG, 4.8%), MET CNG (2.2), CDKN2A p.Thr77fs (0.9%)                                                                            | Crizotinib | TP53 R158H (0.2%), EGFR R836H (0.2%), PDGFRA R558H (0.2%)                                                              |
| 12 | NSCLC NOS            | Pre-treatment                      | METex14 (c.2888-5_2905delTTAAGATCTGGGCAGTGAATTA, 2%), RECQL4 splice site (2464-1G>C, 46%), SMAD4 Q224X (10%), CDK4 CNG (22.4), KMT2A CNG (7.2), MDM2 CNG (11.5) <sup>b</sup> | Crizotinib | METex14 (0.6%), MET D1228H (0.1%), TP53 F270L (0.1%)                                                                   |

<sup>a</sup>cfDNA analysis via FoundationACT assay.

<sup>b</sup>Sequencing prior to known MET TKI exposure performed on a tumor biopsy sample rather than via plasma cfDNA analysis, utilizing a University of Florida in-house NGS assay (patient 2), Foundation One (patient 5), or Cancer-Select assay (patient 12).

<sup>c</sup>Followed by pemetrexed prior to cfDNA testing.

**Genomic alterations in the cfDNA of patients treated with a MET TKI.** Genomic alterations identified upon targeted sequencing for cancer-associated genes in cfDNA samples obtained following known MET TKI exposure compared to results of samples obtained prior to known MET TKI exposure. Sequencing performed via the Guardant360 assay, unless otherwise specified. Further details for patient one in Figure 2A and further details for patient two in Figure 2B. Additional details regarding patient five have previously been published (6,8). Abbreviations: NOS, not otherwise specified; CNG, copy number gain

Supplemental Table S3

| Treatment Status              | Diagnosis                            | Crizotinib Treatment |    |     | Crizotinib Held | Crizotinib Resumed |      |      | Crizotinib +Trametinib |
|-------------------------------|--------------------------------------|----------------------|----|-----|-----------------|--------------------|------|------|------------------------|
| Radiographic Response         | N/A                                  | PR                   | PR | PR  | PD              | PD                 | PD   | PD   | Unknown                |
| Time After Diagnosis (months) | 0                                    | 1.4                  | 2  | 3.7 | 5               | 6.7                | 8.2  | 10   | 10.5                   |
| Gene Variant                  | cfDNA frequency (%)/Copy Number Gain |                      |    |     |                 |                    |      |      |                        |
| <i>MET</i> ex14               | 7.6                                  | 0                    | 0  | 0   | 2.1             | 0.5                | 0.9  | 5.1  | 1.6                    |
| <i>BRAF</i> R199G             | 0                                    | 0.2                  | 0  | 0.2 | 0               | 0                  | 0    | 0.1  | 0                      |
| <i>PIK3CA</i> R38H            | 0                                    | 0                    | 0  | 0   | 0               | 0                  | 0.1  | 0    | 0                      |
| <i>PTEN</i> E43Q              | 0.1                                  | 0                    | 0  | 0   | 0               | 0                  | 0    | 0    | 0                      |
| <i>MET</i> Y1230S             | 0                                    | 0                    | 0  | 0   | 0               | 0                  | 0    | 1.5  | 0.3                    |
| <i>MET</i> F1200I             | 0                                    | 0                    | 0  | 0   | 0               | 0                  | 0    | 0.2  | 0.2                    |
| <i>KRAS</i> copy number gain  | 0                                    | 0                    | 0  | 0   | 0               | 0                  | 2.28 | 2.25 | 0                      |
| <i>CCNE1</i> copy number gain | 2.3                                  | 0                    | 0  | 0   | 0               | 0                  | 0    | 2.2  | 0                      |

**Serial plasma cfDNA testing (patient one).** The results of serial cell-free DNA sequencing utilizing the Guardant360 assay, in a patient with *MET* exon 14 mutated lung adenocarcinoma during response and after acquired resistance to the *MET* tyrosine kinase inhibitor crizotinib, and following initial treatment with the combination of crizotinib plus trametinib. Samples in the setting of resistance to crizotinib are notable for new *KRAS* copy number gain, as well as new *MET* Y1230S and F1200I mutations. Abbreviations: N/A, not applicable; PD, progressive disease; PR, partial response;

**Supplemental Table S4**

| <b>Gene</b> | <b>Variant</b>                 | <b>Mutant Allele Frequency/Reads</b> |
|-------------|--------------------------------|--------------------------------------|
| KRAS        | Copy number gain               | ~22x                                 |
| MET         | c.3028+3A>G (exon 14 skipping) | 48%                                  |
| TP53        | c.375_375+2dupGGT              | 32%                                  |
| RBM10       | p.K700*                        | 36%                                  |
| ERBB4       | c.1490-1G>T                    | 8%                                   |
| MUTYH       | c.788+8G>T                     | 8%                                   |
| TSHR        | p.R450H                        | 8%                                   |
| PTPRT       | p.D113N                        | 8%                                   |
| ARID2       | p.D1703N                       | 6%                                   |
| ZFHX4       | p.A386T, p.Q2415H              | 8%, 7%                               |
| BCORL1      | p.G1479R                       | 15%                                  |
| PARK2       | p.D280E                        | 10%                                  |
| PDGFRB      | p.P250H                        | 9%                                   |
| PRKAR1A     | p.S77L                         | 7%                                   |
| TSHZ3       | p.F67V                         | 4%                                   |

**Tumor next generation sequencing (NGS) results (patient one).** Genomic alterations identified by targeted-sequencing for cancer-associated genomic alterations (UCSF500 Assay) within a biopsy specimen from a rib metastasis progressing during treatment with crizotinib, showing 22-fold *KRAS* copy number gain.

## Supplemental Table S5

### A. Pre-treatment lung biopsy, University of Florida GatorSeq NGS

| Gene   | cDNA                | Alteration       | VAF (%)            |
|--------|---------------------|------------------|--------------------|
| MET    | c.2888-19_2895del27 | Exon 14 Skipping | 8.0%               |
| BCR    | c.2515C>T           | p.R839C          | 46.4% <sup>b</sup> |
| DNMT3A | c.2645G>A           | p.R882H          | 6.3% <sup>a</sup>  |
| MKL1   | c.1942A>G           | p.S648G          | 99.9% <sup>b</sup> |
| ALK    | c.4381A>G           | p.I1461V         | 99.7% <sup>b</sup> |
| ASXL1  | c.2444T>C           | p.L815P          | 99.6% <sup>b</sup> |
| FLT3   | c.680C>T            | p.T227M          | 99.5% <sup>b</sup> |
| EGFR   | c.1562G>A           | p.R521K          | 62.7% <sup>b</sup> |
| ALK    | c.4472A>G           | p.K1491R         | 51.2% <sup>b</sup> |
| TET2   | c.5284A>G           | p.I1762V         | 51.1% <sup>b</sup> |
| BCR    | c.2387A>G           | p.N796S          | 50.5% <sup>b</sup> |
| PML    | c.1933T>C           | p.F645L          | 50.5% <sup>b</sup> |
| ALK    | c.4587C>G           | p.D1529E         | 49.5% <sup>b</sup> |
| PDGFRA | c.1432T>C           | p.S478P          | 45.9% <sup>b</sup> |
| TP53   | c.215C>G            | p.P72R           | 45.8% <sup>b</sup> |

<sup>a</sup>Present in peripheral blood mononuclear cells

<sup>b</sup>Scored as single nucleotide polymorphisms

### B. Pre-treatment, plasma cfDNA, Foundation ACT assay

| Gene     | Alteration       | cfDNA Frequency (%) |
|----------|------------------|---------------------|
| MET      | Exon 14 skipping | 2.2%                |
| KRAS     | G12D             | 7.8%                |
| BRAF     | S446L            | VUS                 |
| PDCD1LG2 | F3fs*1           | VUS                 |

### C. Crizotinib progression, liver biopsy, Foundation One assay

| Gene     | Alteration       | VAF(%) / CNG |
|----------|------------------|--------------|
| MET      | Exon 14 Skipping | 77.9%        |
| KRAS     | Amplification    | 11x          |
| KRAS     | G12D             | 47.4%        |
| HGF      | Amplification    | 11x          |
| MDM2     | Amplification    | 10x          |
| CDKN2A/B | Loss             | 0x           |
| FRS2     | Amplification    | 10x          |
| ARID1A   | Q1334_R1335insQ  | VUS          |
| FAT1     | T2444I           | VUS          |
| MLL2     | R3099H           | VUS          |
| MLL3     | M305L            | VUS          |
| FLT1     | P1201I           | VUS          |
| GLI1     | L847R            | VUS          |
| GPR124   | P168R, P550S     | VUS          |
| PLCG2    | A420T            | VUS          |
| PPP2R1A  | P493L            | VUS          |
| PRKDC    | S1300G           | VUS          |

|        |       |     |
|--------|-------|-----|
| LRP1B  | I844M | VUS |
| SNCAIP | D36N  | VUS |

**Results of serial sequencing of tumor tissue and plasma cfDNA (patient two).** **A.** Pre-treatment targeted sequencing using the University of Florida GatorSeq NGS assay of a lung tumor lesion which would subsequently respond to crizotinib. **B.** cfDNA sequencing via the Foundation ACT assay prior to mixed response to crizotinib showed a *KRAS* G12D mutation. **C.** Subsequent biopsy of a metastatic liver lesion progressive on crizotinib showed the same *KRAS* G12D mutation as well as 11-fold *KRAS* copy number gain and 11-fold *HGF* copy number gain. Abbreviations: VAF, variant allele fraction; VUS, variant of unknown significance.

Supplemental Table S6

| NGS Panel                                       | Gene List                                                                                                                                                                                                                                                                                                                                                                                                                                                                                                                                                                                                                                                                                                                                                                                                                                                                                                                                                                                                                                                                                                                                                                                                                                                                                                                                                                                                                                                                                                                                                                                                                                                                                                                                                                                                                                                                                                                                                                                                                                                                                                                                                         |
|-------------------------------------------------|-------------------------------------------------------------------------------------------------------------------------------------------------------------------------------------------------------------------------------------------------------------------------------------------------------------------------------------------------------------------------------------------------------------------------------------------------------------------------------------------------------------------------------------------------------------------------------------------------------------------------------------------------------------------------------------------------------------------------------------------------------------------------------------------------------------------------------------------------------------------------------------------------------------------------------------------------------------------------------------------------------------------------------------------------------------------------------------------------------------------------------------------------------------------------------------------------------------------------------------------------------------------------------------------------------------------------------------------------------------------------------------------------------------------------------------------------------------------------------------------------------------------------------------------------------------------------------------------------------------------------------------------------------------------------------------------------------------------------------------------------------------------------------------------------------------------------------------------------------------------------------------------------------------------------------------------------------------------------------------------------------------------------------------------------------------------------------------------------------------------------------------------------------------------|
| <b>Guardant360, 70-Gene Assay</b>               | AKT1, ALK, APC, AR, ARAF, ARID1A, ATM, BRAF, BRCA1, BRCA2, CCND1, CCND2, CCNE1, CDH1, CDK4, CDK6, CDKN2A, CTNNB1, EGFR, ERBB2, ESR1, EZH2, FBXW7, FGFR1, FGFR2, FGFR3, GATA3, GNA11, GNAQ, GNAS, HNF1A, HRAS, IDH1, IDH2, JAK2, JAK3, KIT, KRAS, MAP2K1, MAP2K2, MET, MLH1, MPL, MYC, NF1, NFE2L2, NOTCH1, NPM1, NRAS, NTRK1, PDGFRA, PIK3CA, PTEN, PTPN11, RAF1, RB1, RET, RHEB, RHOA, RIT1, ROS1, SMAD4, SMO, STK11, TERT, TP53, TSC1, VHL, CDKN2B <sup>a</sup> , SRC <sup>a</sup>                                                                                                                                                                                                                                                                                                                                                                                                                                                                                                                                                                                                                                                                                                                                                                                                                                                                                                                                                                                                                                                                                                                                                                                                                                                                                                                                                                                                                                                                                                                                                                                                                                                                              |
| <b>Guardant360, 73-Gene Assay</b>               | AKT1, ALK, APC, AR, ARAF, ARID1A, ATM, BRAF, BRCA1, BRCA2, CCND1, CCND2, CCNE1, CDH1, CDK4, CDK6, CDKN2A, CTNNB1, DDR2 <sup>a</sup> , EGFR, ERBB2, ESR1, EZH2, FBXW7, FGFR1, FGFR2, FGFR3, GATA3, GNA11, GNAQ, GNAS, HNF1A, HRAS, IDH1, IDH2, JAK2, JAK3, KIT, KRAS, MAP2K1, MAP2K2, MAPK1 <sup>a</sup> , MAPK3 <sup>a</sup> , MET, MLH1, MPL, MTOR <sup>a</sup> , MYC, NF1, NFE2L2, NOTCH1, NPM1, NRAS, NTRK1, NTRK3 <sup>a</sup> , PDGFRA, PIK3CA, PTEN, PTPN11, RAF1, RB1, RET, RHEB, RHOA, RIT1, ROS1, SMAD4, SMO, STK11, TERT, TP53, TSC1, VHL                                                                                                                                                                                                                                                                                                                                                                                                                                                                                                                                                                                                                                                                                                                                                                                                                                                                                                                                                                                                                                                                                                                                                                                                                                                                                                                                                                                                                                                                                                                                                                                                               |
| <b>University of Florida GatorSeq NGS Assay</b> | ABL1, AKT1, ALK, ASXL1, BAALC, BCOR, BCR, BRAF, BRINP3, CBF, CEBPA, CRLF2, CTNNB1, DDR2, DEK, DNMT3A, EGFR, ERBB2, ERG, ETV6, EZH2, FBXW7, FGFR1, FGFR2, FLT3, GNA11, GNAQ, HOXA9, HRAS, IDH1, IDH2, JAK2, KIT, KMT2A, KRAS, MAP2K1, MECOM, MET, MKL1, MLLT3, MN1, MPL, MYC, MYH11, NF1, NOTCH1, NPM1, NRAS, NUP214, PDGFRA, PHF6, PIK3CA, PML, PTEN, PTPN11, RAD21, RARA, RBM15, RET, RPN1, RUNX1, RUNX1T1, SF3B1, SMAD4, SMC1A, SMC3, SMO, SRSF2, STAG2, TET2, TP53, TSC1, U2AF1, U2AF2, WT1, ZRSR2                                                                                                                                                                                                                                                                                                                                                                                                                                                                                                                                                                                                                                                                                                                                                                                                                                                                                                                                                                                                                                                                                                                                                                                                                                                                                                                                                                                                                                                                                                                                                                                                                                                             |
| <b>UCSF500 NGS Assay</b>                        | ABL1, ABL2, ACVR1, ACVR1B, AJUBA, AKT1, AKT2, AKT3, ALK, AMER1, APC, APOBEC3G, AR, ARAF, ARFRP1, ARHGAP35, ARID1A, ARID1B, ARID2, ARID5B, ASH2L, ASXL1, ASXL2, ATF1, ATM, ATR, ATRX, AURKA, AURKB, AXIN1, AXIN2, AXL, BAP1, BARD1, BCL2, BCL2A1, BCL2L1, BCL2L12, BCL2L2, BCL6, BCOR, BCORL1, BLM, BRAF, BRCA1, BRCA2, BRD4, BRIP1, BTG1, BTK, C11orf30, CALR, CARD11, CBF, CBL, CBLB, CCND1, CCND2, CCND3, CCNE1, CD274, CD79A, CD79B, CDC42, CDC73, CDH1, CDK12, CDK4, CDK6, CDK8, CDKN1A, CDKN1B, CDKN2A, CDKN2B, CDKN2C, CEBPA, CHD1, CHD2, CHD4, CHD5, CHEK1, CHEK2, CIC, CLDN18, CNOT3, COL1A1, COL2A1, CRCT1, CREB1, CREBBP, CRKL, CSF1R, CSF3R, CTCF, CTNNA1, CTNNB1, CUL3, CUX1, CXCR4, CYLD, DCC, DDIT3, DDR2, DDX3X, DDX41, DGKH, DICER1, DIS3, DNAJB1, DNMT3A, DOT1L, DUSP2, DUSP4, DUSP6, DYNC111, EBF1, EDNRB, EGFR, EGR1, EIF1AX, ELF3, EP300, EPCAM, EPHA2, EPHA3, EPHA5, EPHA7, EPHB1, EPOR, ERBB2, ERBB3, ERBB4, ERCC1, ERCC2, ERG, ERFF1, ESPL1, ESR1, ESR2, ETS1, ETV6, EWSR1, EZH1, EZH2, FAM46C, FANCA, FANCC, FANCE, FANCF, FANCG, FANCL, FAT1, FAT3, FBXW7, FGF10, FGF14, FGF19, FGF23, FGF3, FGF4, FGF6, FGFR1, FGFR2, FGFR3, FGFR4, FH, FLCN, FLT1, FLT3, FLT4, FOXA1, FOXL2, FOXO1, FOXP1, FRS2, FUBP1, FUS, FYN, GAB2, GATA1, GATA2, GATA3, GLI1, GLI2, GNA11, GNA13, GNAQ, GNAS, GPC3, GPR124, GRIN2A, GRM3, GSK3B, H3F3A, H3F3B, HDAC4, HDAC9, HEY1, HGF, HIF1A, HIST1H3B, HMGA2, HNF1A, HOXB13, HRAS, HSP90AB1, HSPA2, HSPA5, ID3, IDH1, IDH2, IGF1R, IGF2, IGF2R, IKBKE, IKZF1, IKZF2, IKZF3, IL2RB, IL7R, INHBA, INPP4B, IPMK, IRF4, IRS2, JAK1, JAK2, JAK3, JAZF1, KAT6A, KDM5A, KDM5C, KDM6A, KDR, KEAP1, KIT, KLF4, KLHL6, KMT2A, KMT2B, KMT2D, KNSTRN, KRAS, LEF1, LIFR, LRP1B, LZTR1, MALAT1, MAML2, MAP2K1, MAP2K2, MAP2K4, MAP3K1, MAP3K2, MAP3K5, MAP3K7, MAP3K9, MAPK1, MCL1, MDM2, MDM4, MED12, MEF2B, MEN1, MET, MGA, MGMT, MITF, MLH1, MLH3, MPL, MRE11A, MSH2, MSH3, MSH6, MTOR, MUTYH, MYB, MYBL1, MYC, MYCL, MYCN, MYD88, MYH9, NAV3, NBN, NCKAP5, NCOA2, NCOA3, NCOR1, NF1, NF2, NFE2L2, NFKBIA, NFKBIE, NIPBL, NKX2-1, NOTCH1, NOTCH3, NPM1, NRAS, NSD1, NT5C2, NTRK1, NTRK2, NTRK3, NUP93, NUTM1, OR5L1, PAK1, |



|  |                                                                                                                                                                                                                                                                                                                                                                                                                                                                                                                                                                                                                                                                                                                                                                                                                                                                                                                                                                                                                                                                                                                                                                                                       |
|--|-------------------------------------------------------------------------------------------------------------------------------------------------------------------------------------------------------------------------------------------------------------------------------------------------------------------------------------------------------------------------------------------------------------------------------------------------------------------------------------------------------------------------------------------------------------------------------------------------------------------------------------------------------------------------------------------------------------------------------------------------------------------------------------------------------------------------------------------------------------------------------------------------------------------------------------------------------------------------------------------------------------------------------------------------------------------------------------------------------------------------------------------------------------------------------------------------------|
|  | PAK3, PALB2, PARK2, PAX3, PAX5, PAX7, PAX8, PBRM1, PDCD1LG2, PDGFB, PDGFRA, PDGFRB, PDK1, PHF6, PHOX2B, PIK3CA, PIK3CG, PIK3R1, PIK3R2, PLAG1, PLCB4, PMS1, POLD1, POLE, POLQ, POT1, POU3F2, PPM1D, PPP2R1A, PPP6C, PRDM1, PREX2, PRKACA, PRKAG2, PRKAR1A, PRKCA, PRKCH, PRKDC, PTCH1, PTCH2, PTEN, PTK2B, PTPN1, PTPN11, PTPRB, PTPRD, PTPRK, PTPRT, RAC1, RAD21, RAD50, RAD51, RAD51C, RAD51D, RAF1, RARA, RASA1, RASA2, RB1, RBM10, REL, RELA, RET, RHEB, RHOA, RICTOR, RIT1, RNF43, ROBO1, ROS1, RPL10, RPTOR, RRAGC, RRAS, RRAS2, RSPO2, RSPO3, RUNX1, RUNX1T1, SDHB, SDHD, SETBP1, SETD2, SF3B1, SH2B3, SHH, SIN3A, SLIT2, SLITRK6, SMAD2, SMAD3, SMAD4, SMARCA2, SMARCA4, SMARCB1, SMC1A, SMC3, SMO, SNCAIP, SOCS1, SOS1, SOS2, SOX10, SOX2, SOX9, SPEN, SPOP, SPRED1, SPRY1, SPRY2, SPRY4, SPTA1, SRC, SRSF2, SS18, STAG2, STAT3, STAT4, STAT6, STK11, SUFU, SYK, SYNE1, TADA1, TBX3, TCEB1, TCF7L2, TERT, TET2, TFE3, TFEB, TGFBR2, TLR4, TMPRSS2, TNFAIP3, TNFRSF14, TOP1, TOP2A, TP53, TRAF3, TRAF7, TRIM28, TSC1, TSC2, TSHR, TSHZ2, TSHZ3, TSLP, TTYH1, TYK2, U2AF1, USP7, VEGFA, VHL, WHSC1, WISP3, WRN, WT1, XBP1, XPO1, YAP1, YWHAE, ZBTB20, ZFH3, ZFH4, ZMYM3, ZNF217, ZNF703, ZRSR2 |
|--|-------------------------------------------------------------------------------------------------------------------------------------------------------------------------------------------------------------------------------------------------------------------------------------------------------------------------------------------------------------------------------------------------------------------------------------------------------------------------------------------------------------------------------------------------------------------------------------------------------------------------------------------------------------------------------------------------------------------------------------------------------------------------------------------------------------------------------------------------------------------------------------------------------------------------------------------------------------------------------------------------------------------------------------------------------------------------------------------------------------------------------------------------------------------------------------------------------|

<sup>a</sup>Excluded from 68 gene set in common between 70 and 73 gene sets

**Genes included in NGS Panels.** List of cancer-associated genes included in the 70- and 73-gene versions of the Guardant360 assay, University of Florida GatorSeq NGS assay, and UCSF500 NGS assay.

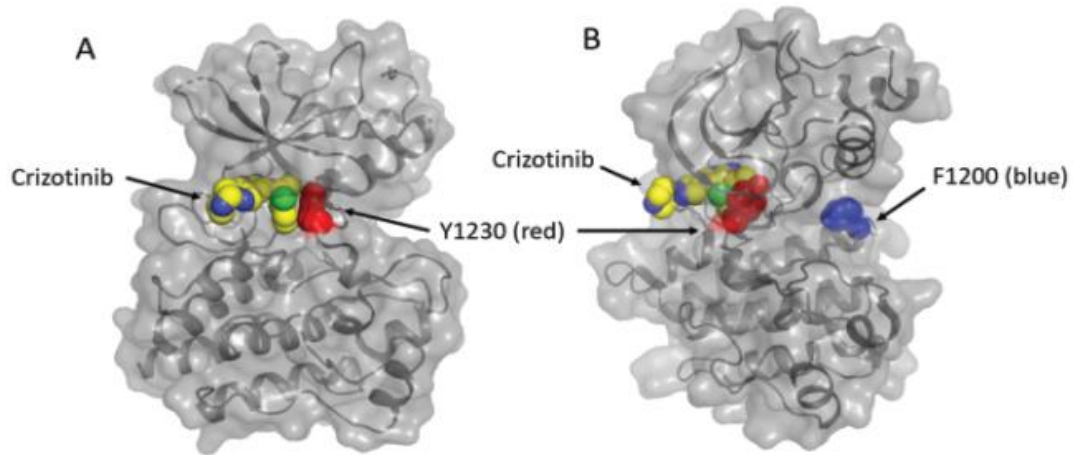

**Supplemental Figure S1. MET tyrosine kinase domain modeling location of the F1200 residue.**

*MET* Y1230 and F1200 residues modeled in their structural context based on PDB 2WGJ. **A.** Crizotinib is shown in yellow, in close approximation to the *MET* Y1230 residue (red), as a frequently reported site of type I *MET* TKI resistance mutations. **B.** The location of the F1200 mutation at the DFG-out pocket, at a disparate location from the crizotinib binding site, is highlighted in blue.

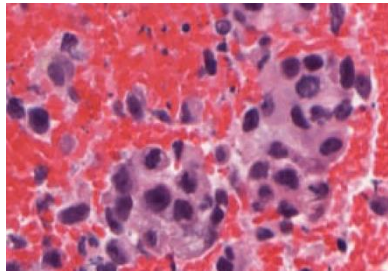

**Pre-treatment**

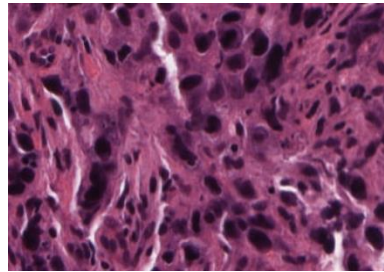

**Crizotinib Resistance**

**Supplemental Figure S2. Serial H&E slides.** Tumor biopsy samples from a metastatic rib soft tissue lesion obtained prior to treatment and at acquired resistance to crizotinib confirm continued adenocarcinoma histology upon pathology review. Hematoxylin and eosin (H&E) staining on 4 micron FFPE slides, viewed at 20X magnification.

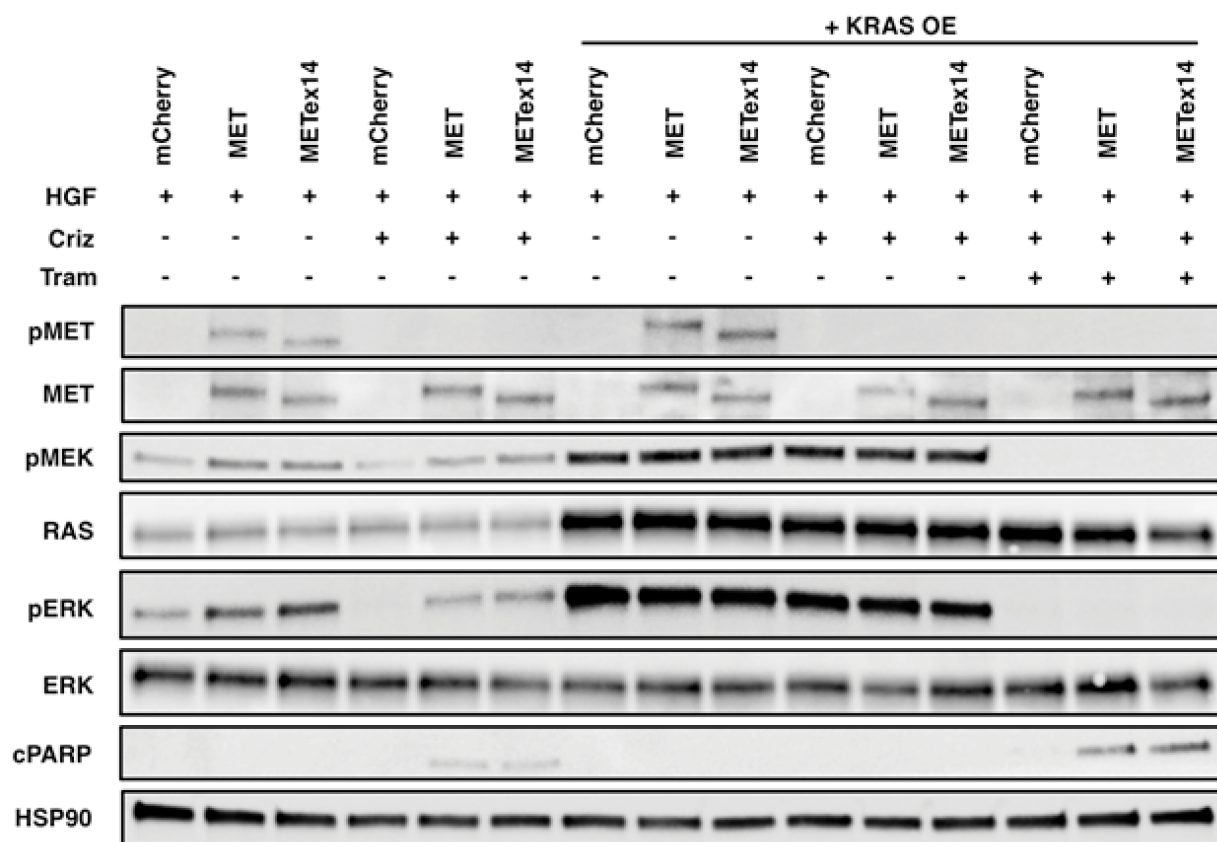

**Supplemental Figure S3. Downstream MAPK pathway activation in a Ba/F3 METex14 model is induced by KRAS overexpression and inhibited by addition of trametinib.** Ba/F3 cells with stable expression of wild type MET, MET with an exon 14 skipping mutation (METex14), or mCherry control were treated with 50 ng/mL HGF with or without 24 hours treatment with crizotinib at 0.1  $\mu$ M, trametinib (0.01  $\mu$ M), and/or KRAS overexpression (KRAS OE). Treatment with crizotinib inhibits MET phosphorylation and inhibits downstream Erk phosphorylation, with associated increase in apoptosis as measured by cleaved PARP (cPARP). KRAS overexpression restored downstream Erk phosphorylation and reduced cleaved PARP, despite crizotinib treatment. Addition of trametinib inhibited Erk phosphorylation and increased cleaved PARP, consistent with induction of apoptosis.

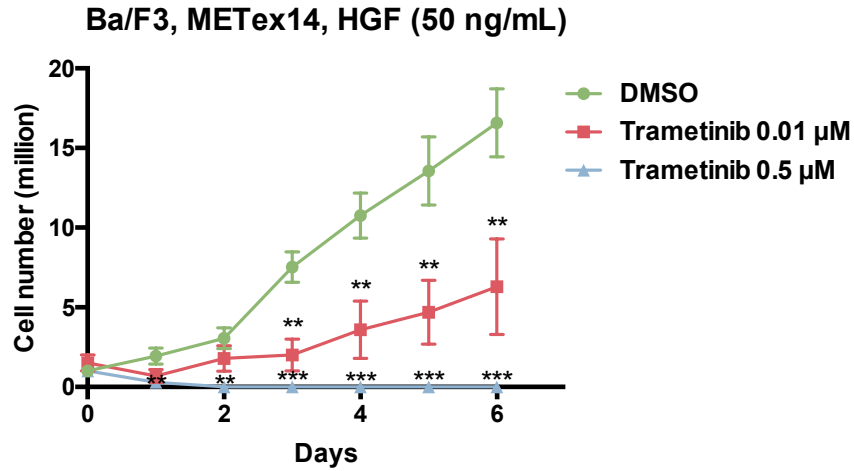

**Supplemental Figure S4. Relative cell viability of Ba/F3 METex14 cells treated with trametinib monotherapy.** Ba/F3 cells overexpressing METex14 were treated with HGF (50 ng/mL) with either DMSO control, trametinib 0.01  $\mu\text{M}$ , or trametinib 0.5  $\mu\text{M}$ . Cell growth is reduced but not eliminated at the 0.01  $\mu\text{M}$  dose of trametinib. \*\*  $p$ -value < 0.01, \*\*\*  $p$ -value < 0.001 by student's t-test.
